# Supplementary material for: Characterization of biofilm production in different strains of Acinetobacter baumannii and the effects of chemical compounds on biofilm formation
Source: PeerJ. 2020 May 28;8:e9020. doi: 10.7717/peerj.9020 (PMC7261477; doi:10.7717/peerj.9020)
Supplement: Data S1 [file peerj-08-9020-s002.xlsx]

## Sheet: FIG1
	490/595								OD595					OD490						OD490 control
	1	2	3		avg	SD			1	2	3			1	2	3	avg			0.036
✽ VGH2	1.79766	1.77196	1.71678	✽ VGH2	1.76213	0.0337415		✽ VGH2	1.2405	1.241	1.144		✽ VGH2	2.23	2.199	1.964	2.131			0.038
ABcol	1.2179	1.21105	1.68378	ABcol	1.37091	0.221252		ABcol	0.771	0.86	0.857		ABcol	0.939	1.0415	1.443	1.14117			0.048
17978	1.35805	1.34279	1.31527	17978	1.3387	0.0177009		17978	0.9845	0.652	1.0705		17978	1.337	0.8755	1.408	1.20683		avg	0.0406667
ABhl1tc	1.35503	1.3107	1.28355	ABhl1tc	1.31643	0.0294631		ABhl1tc	0.745	0.5745	0.6595		ABhl1tc	1.0095	0.753	0.8465	0.869667		SD	0.00524934
ABtc	1.16882	1.34501	1.16542	ABtc	1.22642	0.0838669		ABtc	0.9655	0.971	0.934		ABtc	1.1285	1.306	1.0885	1.17433
∆baeR	1.04906	1.19423	1.15343	∆baeR	1.13224	0.0611324		∆baeR	1.06	1.04	1.0265		∆baeR	1.112	1.242	1.184	1.17933		ODc	0.055
∆emrA	1.10299	1.05848	1.12958	∆emrA	1.09702	0.0293322		∆emrA	1.0195	0.684	0.737		∆emrA	1.1245	0.724	0.8325	0.893667		2 x ODc	0.11
ABtcm	1.03688	0.681159	0.954651	ABtcm	0.890898	0.15206		ABtcm	0.9625	1.0695	1.0805		ABtcm	0.998	0.7285	1.0315	0.919333		4 x ODc	0.22
✽ ABhl1	0.746897	0.958333	0.793897	✽ ABhl1	0.833042	0.090648		✽ ABhl1	1.128	1.116	1.065		✽ ABhl1	0.8425	1.0695	0.8455	0.919167
✽ CM4	0.696246	0.833133	0.858232	✽ CM4	0.79587	0.0711864		✽ CM4	0.7325	0.4165	0.656		✽ CM4	0.51	0.347	0.563	0.473333
✽ CM1	0.741199	0.768166	0.698471	✽ CM1	0.735945	0.0286943		✽ CM1	1.051	1.0115	0.9485		✽ CM1	0.779	0.777	0.6625	0.7395
Abamk	0.75	0.725645	0.686294	Abamk	0.720646	0.0262468		Abamk	1.16	0.9495	0.985		Abamk	0.87	0.689	0.676	0.745
✽ HC2	0.654779	0.753023	0.722471	✽ HC2	0.710091	0.0410523		✽ HC2	1.0515	1.075	1.117		✽ HC2	0.6885	0.8095	0.807	0.768333
✽ HC3	0.689422	0.756112	0.67608	✽ HC3	0.707205	0.035009		✽ HC3	0.813	0.8385	1.1685		✽ HC3	0.5605	0.634	0.79	0.6615
✽ CM2	0.727083	0.656885	0.719286	✽ CM2	0.701085	0.0314157		✽ CM2	1.2	1.1075	0.7		✽ CM2	0.8725	0.7275	0.5035	0.701167
✽ HC1	0.593904	0.686149	0.609568	✽ HC1	0.629874	0.0403031		✽ HC1	0.607	0.6245	0.648		✽ HC1	0.3605	0.4285	0.395	0.394667
∆emrB	0.561949	0.516985	0.623202	∆emrB	0.567378	0.0435326		∆emrB	1.0775	1.0745	1.0775		∆emrB	0.6055	0.5555	0.6715	0.610833
✽ HC4	0.575664	0.574194	0.549808	✽ HC4	0.566555	0.011857		✽ HC4	0.8095	0.775	0.783		✽ HC4	0.466	0.445	0.4305	0.447167
✽ CT14	0.449352	0.525789	0.696064	✽ CT14	0.557068	0.10312		✽ CT14	1.0415	0.95	1.0035		✽ CT14	0.468	0.4995	0.6985	0.555333
✽ CM3	0.434819	0.646353	0.374332	✽ CM3	0.485168	0.116619		✽ CM3	1.2005	1.083	1.0285		✽ CM3	0.522	0.7	0.385	0.535667
✽ VGH4	0.443684	0.44177	0.507087	✽ VGH4	0.46418	0.0303494		✽ VGH4	0.95	0.644	0.9525		✽ VGH4	0.4215	0.2845	0.483	0.396333
✽ VGH5	0.434686	0.461702	0.412979	✽ VGH5	0.436456	0.0199303		✽ VGH5	0.8995	0.47	0.5085		✽ VGH5	0.391	0.217	0.21	0.272667
∆ompA	0.423886	0.422642	0.435139	∆ompA	0.427222	0.00562081		∆ompA	0.808	0.9275	0.794		∆ompA	0.3425	0.392	0.3455	0.36
ABipm	0.348028	0.410435	0.478689	ABipm	0.412384	0.0533598		ABipm	0.862	0.575	0.7625		ABipm	0.3	0.236	0.365	0.300333
✽ CT12	0.317337	0.47588	0.418951	✽ CT12	0.404056	0.0655764		✽ CT12	0.8335	0.3835	0.6385		✽ CT12	0.2645	0.1825	0.2675	0.238167
✽ VGH7	0.326123	0.30628	0.509259	✽ VGH7	0.380554	0.0913682		✽ VGH7	0.9015	0.844	0.81		✽ VGH7	0.294	0.2585	0.4125	0.321667
✽ CT13	0.328093	0.450943	0.36229	✽ CT13	0.380442	0.0517699		✽ CT13	0.7315	0.795	0.7425		✽ CT13	0.24	0.3585	0.269	0.289167
19606	0.342629	0.454545	0.325698	19606	0.374291	0.0571678		19606	0.8785	0.935	0.895		19606	0.301	0.425	0.2915	0.339167
✽ VGH6	0.319066	0.339514	0.40017	✽ VGH6	0.352917	0.0344401		✽ VGH6	0.771	0.782	0.5885		✽ VGH6	0.246	0.2655	0.2355	0.249
✽ VGH3	0.3701	0.280985	0.372685	✽ VGH3	0.341257	0.0426314		✽ VGH3	0.7525	0.6495	0.648		✽ VGH3	0.2785	0.1825	0.2415	0.234167
✽ HC5	0.26461	0.352493	0.36284	✽ HC5	0.326648	0.0440699		✽ HC5	0.924	0.722	0.5705		✽ HC5	0.2445	0.2545	0.207	0.235333
✽ VGH1	0.299431	0.268199	0.340923	✽ VGH1	0.302851	0.0297879		✽ VGH1	0.703	0.6525	0.7905		✽ VGH1	0.2105	0.175	0.2695	0.218333
✽ CT11	0.172759	0.235636	0.299342	✽ CT11	0.235912	0.0516775		✽ CT11	0.848	0.7745	0.456		✽ CT11	0.1465	0.1825	0.1365	0.155167

## Sheet: FIG2
SAM				TZP				CFZ				CMZ				CTX				CAZ				FEP				IPM				MEM				AMK				GEN				CIP				LVX
S		R		S		R		S		R		S		R		S		R		S		R		S		R		S		R		S		R		S		R		S		R		S		R		S
hl1		VGH2	1.76213	17978	1.3387	hl1	0.833042			hl1	0.833042			hl1	0.833042	17978	1.3387	hl1	0.833042	17978	1.3387	hl1	0.833042	CM2		hl1	0.833042	VGH2		hl1	0.833042	CT13	0.380442	VGH2	1.76213	17978	1.3387	VGH2	1.76213	17978	1.3387	VGH2	1.76213	17978	1.3387	VGH2	1.76213	HC1	0.629874
CM4		CM1	0.735945			CM4	0.79587			CM4	0.79587			CM4	0.79587			CM4	0.79587			CM4	0.79587	CT11		CM4	0.79587	VGH3		CM4	0.79587	CT11	0.235912	hl1	0.833042	CM4	0.79587	HC3	0.707205	CM1	0.735945	hl1	0.833042			hl1	0.833042	17978	1.3387
HC1		HC2	0.710091			HC1	0.629874			HC1	0.629874			HC1	0.629874			HC1	0.629874			HC1	0.629874	17978	1.3387	HC1	0.629874	17978	1.3387	CM1	0.735945	17978	1.3387	CM4	0.79587	CM1	0.735945	HC4	0.566555	CT13	0.380442	CM4	0.79587			CM4	0.79587
CM3		HC3	0.707205			CM3	0.485168			CM3	0.485168			CM3	0.485168			CM3	0.485168			CM3	0.485168			CM3	0.485168	CT13	0.380442	HC2	0.710091			CM1	0.735945	CM2	0.701085	VGH7	0.380554			HC2	0.710091			CM1	0.735945
CT13		HC4	0.566555			CT13	0.380442			CT13	0.380442			CT13	0.380442			CT13	0.380442			CT13	0.380442			CT13	0.380442	CT11	0.235912	HC3	0.707205			HC2	0.710091	CM3	0.485168	CT12	0.404056			HC3	0.707205			HC2	0.710091
VGH6		CT14	0.557068			VGH6	0.352917			VGH6	0.352917			VGH6	0.352917			VGH6	0.352917			VGH6	0.352917			VGH6	0.352917			CM2	0.701085			HC3	0.707205	VGH4	0.46418					CM2	0.701085			HC3	0.707205
VGH3		VGH4	0.46418			VGH3	0.341257			VGH3	0.341257			VGH3	0.341257			VGH3	0.341257			VGH3	0.341257			VGH3	0.341257			HC1	0.629874			CM2	0.701085	VGH5	0.436456					HC1	0.629874			CM2	0.701085
17978	1.3387	VGH5	0.436456			VGH2	1.76213			VGH2	1.76213			VGH2	1.76213			VGH2	1.76213			VGH2	1.76213			VGH2	1.76213			HC4	0.566555			HC1	0.629874	CT13	0.380442					HC4	0.566555			HC1	0.629874
CM2	0.701085	CT12	0.404056			CM1	0.735945			CM1	0.735945			CM1	0.735945			CM1	0.735945			CM1	0.735945			CM1	0.735945			CT14	0.557068			HC4	0.566555	VGH3	0.341257					CT14	0.557068			HC4	0.566555
CT11	0.235912	VGH7	0.380554			HC2	0.710091			HC2	0.710091			HC2	0.710091			HC2	0.710091			HC2	0.710091			HC2	0.710091			CM3	0.485168			CT14	0.557068	hl1	0.833042					CM3	0.485168			CT14	0.557068
		HC5	0.326648			HC3	0.707205			HC3	0.707205			HC3	0.707205			HC3	0.707205			HC3	0.707205			HC3	0.707205			VGH4	0.46418			CM3	0.485168	HC2	0.710091					VGH4	0.46418			CM3	0.485168
		VGH1	0.302851			HC4	0.566555			HC4	0.566555			HC4	0.566555			HC4	0.566555			HC4	0.566555			HC4	0.566555			VGH5	0.436456			VGH4	0.46418	HC1	0.629874					VGH5	0.436456			VGH4	0.46418
						CT14	0.557068			CT14	0.557068			CT14	0.557068			CT14	0.557068			CT14	0.557068			CT14	0.557068			CT12	0.404056			VGH5	0.436456	HC5	0.326648					CT12	0.404056			VGH5	0.436456
						VGH4	0.46418			VGH4	0.46418			VGH4	0.46418			VGH4	0.46418			VGH4	0.46418			VGH4	0.46418			VGH7	0.380554			CT12	0.404056	VGH1	0.302851					VGH7	0.380554			CT12	0.404056
						VGH5	0.436456			VGH5	0.436456			VGH5	0.436456			VGH5	0.436456			VGH5	0.436456			VGH5	0.436456			VGH6	0.352917			VGH7	0.380554	CT11	0.235912					VGH6	0.352917			VGH7	0.380554
						CT12	0.404056			CT12	0.404056			CT12	0.404056			CT12	0.404056			CT12	0.404056			CT12	0.404056			HC5	0.326648			VGH6	0.352917	CT14	0.557068					VGH3	0.341257			CT13	0.380442
						VGH7	0.380554			VGH7	0.380554			VGH7	0.380554			VGH7	0.380554			VGH7	0.380554			VGH7	0.380554			VGH1	0.302851			VGH3	0.341257	VGH6	0.352917					HC5	0.326648			VGH6	0.352917
						HC5	0.326648			HC5	0.326648			HC5	0.326648			HC5	0.326648			HC5	0.326648			HC5	0.326648							HC5	0.326648							VGH1	0.302851			VGH3	0.341257
						VGH1	0.302851			VGH1	0.302851			VGH1	0.302851			VGH1	0.302851			VGH1	0.302851			VGH1	0.302851							VGH1	0.302851							CT11	0.235912			HC5	0.326648
						CM2	0.701085			CM2	0.701085			CM2	0.701085			CM2	0.701085			CM2	0.701085																							VGH1	0.302851
						CT11	0.235912			CT11	0.235912			CT11	0.235912			CT11	0.235912			CT11	0.235912																							CT11	0.235912
										17978	1.3387			17978	1.3387																															CT11	0.235912
		0.70127				#DIV/0!				#DIV/0!				#DIV/0!				#DIV/0!				#DIV/0!				#DIV/0!				0.80173				0.906012				0.491977				0.485028				#DIV/0!
SAM				TZP				CFZ				CMZ				CTX				CAZ				FEP				IPM				MEM				AMK				GEN				CIP				LVX
	S	R			S	R			S	R			S	R			S	R			S	R			S	R			S	R			S	R			S	R			S	R			S	R			S
上四分位數	1.01989	0.707926		上四分位數	1.3387	0.707205		上四分位數	#NUM!	0.709369		上四分位數	#NUM!	0.709369		上四分位數	1.3387	0.707205		上四分位數	1.3387	0.707205		上四分位數	1.3387	0.708648		上四分位數	0.859573	0.707205		上四分位數	0.859573	0.708648		上四分位數	0.710091	0.707205		上四分位數	1.03733	0.704145		上四分位數	1.3387	0.705675		上四分位數	1.1615
最大值	1.3387	1.76213		最大值	1.3387	1.76213		最大值	#NUM!	1.76213		最大值	#NUM!	1.76213		最大值	1.3387	1.76213		最大值	1.3387	1.76213		最大值	1.3387	1.76213		最大值	1.3387	0.833042		最大值	1.3387	1.76213		最大值	1.3387	1.76213		最大值	1.3387	1.76213		最大值	1.3387	1.76213		最大值	1.3387
中位數	0.701085	0.510624		中位數	1.3387	0.485168		中位數	#NUM!	0.521118		中位數	#NUM!	0.521118		中位數	1.3387	0.485168		中位數	1.3387	0.485168		中位數	1.3387	0.485168		中位數	0.380442	0.557068		中位數	0.380442	0.557068		中位數	0.485168	0.566555		中位數	0.735945	0.485168		中位數	1.3387	0.474674		中位數	0.984289
最小值	0.235912	0.302851		最小值	1.3387	0.235912		最小值	#NUM!	0.235912		最小值	#NUM!	0.235912		最小值	1.3387	0.235912		最小值	1.3387	0.235912		最小值	1.3387	0.302851		最小值	0.235912	0.302851		最小值	0.235912	0.302851		最小值	0.235912	0.380554		最小值	0.380442	0.235912		最小值	1.3387	0.235912		最小值	0.629874
下四分位數	0.468499	0.39818		下四分位數	1.3387	0.380442		下四分位數	#NUM!	0.38047		下四分位數	#NUM!	0.38047		下四分位數	1.3387	0.380442		下四分位數	1.3387	0.380442		下四分位數	1.3387	0.380498		下四分位數	0.308177	0.404056		下四分位數	0.308177	0.392305		下四分位數	0.352917	0.404056		下四分位數	0.558194	0.366735		下四分位數	1.3387	0.359798		下四分位數	0.807082
avg	0.758567	0.612812		avg	1.3387	0.576634		avg	#DIV/0!	0.611273		avg	#DIV/0!	0.611273		avg	1.3387	0.576634		avg	1.3387	0.576634		avg	1.3387	0.588017		avg	0.651686	0.552327		avg	0.651686	0.604892		avg	0.566324	0.764101		avg	0.818364	0.578575		avg	1.3387	0.561147		avg	0.984289
	0.364047
[truncated: 10 more columns]

## Sheet: FIG3A
									%
	490/595				avg	SD			avg	SD	T-test
17978	1.35805	1.34279	1.31527	17978	1.3387	0.0177009		17978	100	1.32224
∆baeR	1.19423	1.04906	1.15343	∆baeR	1.13224	0.0611324		∆baeR	84.5773	5.39924	0.0328981
∆emrA	1.10299	1.05848	1.12958	∆emrA	1.09702	0.0293322		∆emrA	81.9461	2.67382	0.00143999
∆emrB	0.561949	0.516985	0.623202	∆emrB	0.567378	0.0435326		∆emrB	42.3826	7.67259	0.000394405
∆ompA	0.435139	0.423886	0.422642	∆ompA	0.427222	0.00562081		∆ompA	31.9131	1.31566	5.07552e-05

## Sheet: FIG4-17978
	AMK							IPM							colistin						Tigecycline							LL37							Tannic Acid
	0	0.25	0.5	1	μg/mL			0	0.0625	0.125	0.25	μg/mL			0	0.25	0.5	1	μg/mL		0	31.25	62.5	125	ng/mL			0	4	8	16	μg/mL			0	50	100	200	μg/mL
RBFI	0.997214	0.624369	0.66903	0.6933			RBFI	0.976072	1.03289	1.05619	1.12231			RBFI	1.00677	0.991561	0.80664	0.659777		RBFI	1.01633	1.05884	1.12807	2.92712			RBFI	0.852475	0.754016	0.62705	0.766326			RBFI	1.00744	0.77192	0.901163	0.789579
	1.01749	0.796497	0.857989	0.419531				1.01249	1.01209	1.10068	0.868936				0.972746	0.92723	0.715309	0.739159			0.937742	0.916972	1.45225	1.87581				1.07125	0.830589	0.741769	0.576999				0.947525	0.778646	0.886953	0.814555
	1.01031	0.933695	0.822255	0.481896				1.01144	0.994675	0.863526	1.11907				1.02049	1.06445	0.658049	0.722031			1.04593	1.01317	1.33801	2.51583				1.07627	0.743279	0.656473	0.671988				1.04503	0.886563	0.862374	0.828205
avg	1.00834	0.784854	0.783091	0.531576			avg	1	1.01322	1.0068	1.03677			avg	1	0.994413	0.726666	0.706989		avg	1	0.996329	1.30611	2.43959			avg	1	0.775962	0.675097	0.671771			avg	1	0.812376	0.883496	0.81078
SD	0.00839527	0.12655	0.0819624	0.117156			SD	0.0169253	0.015622	0.102925	0.118684			SD	0.0200689	0.0560555	0.0611914	0.0341081		SD	0.0456514	0.0591305	0.134252	0.43257			SD	0.104336	0.0388757	0.0486502	0.0772926			SD	0.0401531	0.0525296	0.016023	0.0159935
T-test		0.0673395	0.0180502	0.00456314			T-test		0.462549	0.930983	0.686831			T-test		0.900838	0.00387655	0.000470164		T-test		0.947934	0.0379209	0.00944424			T-test		0.0466029	0.0162474	0.023274			T-test		0.0159553	0.0189225	0.00345948
	AMK							IPM							colistin						Tigecycline							LL37							Tannic Acid
	0	0.25	0.5	1	μg/mL			0	0.0625	0.125	0.25	μg/mL			0	0.25	0.5	1	μg/mL		0	31.25	62.5	125	ng/mL			0	4	8	16	μg/mL			0	50	100	200	μg/mL
OD595	0.757	0.34	0.323	0.114			OD595	0.817	0.6515	0.5675	0.695872			OD595	0.817	0.302	0.232	0.833		OD595	0.857	0.845	0.245	0.12			OD595	0.817	0.754	0.862	0.926			OD595	0.817	0.927	0.968	0.926
	0.791	0.492	0.255	0.107				0.846948	0.803023	0.836456	0.829				0.966	0.72	0.789	0.8715			0.913	0.9	0.189	0.115				0.766	0.818	0.9115	0.957				0.817	1.085	0.912	0.892
	1.0295	0.682	0.304	0.211				1.0295	0.761	0.855	0.739				0.789	0.6825	0.8515	1.024			0.937	0.919	0.231	0.123				0.6905	0.9635	0.9745	0.9405				0.966	0.948	1.051	1.032

## Sheet: FIG5-VGH2
	AMK							IPM							colistin						Tigecycline							LL37							Tannic Acid
	0	256	512	1024	μg/mL			0	4	8	16	μg/mL			0	0.125	0.25	0.5	μg/mL		0	0.25	0.5	1	μg/mL			0	2	4	8	μg/mL			0	50	100	200	μg/mL
RBFI	1.00313	0.743151	0.702808	0.55298			RBFI	0.954576	0.874209	0.614558	0.829696			RBFI	0.954186	0.853953	0.796344	0.814982		RBFI	0.951118	0.882785	1.42092	2.01695			RBFI	0.969402	0.719087	0.648952	0.766589			RBFI	0.958223	0.688198	0.737729	0.622411
	0.958601	0.797176	0.674512	0.48571				0.954616	0.857359	0.941048	0.812989				1.00772	0.935006	0.813934	0.644237			0.983934	1.28054	1.51265	3.41495				1.02004	0.783035	0.732438	0.723375				0.958264	0.823957	0.844975	0.660021
	1.03826	0.789088	0.644238	0.635778				1.09081	0.773667	0.657934	0.810043				1.03809	0.904866	0.82155	0.718249			1.06495	1.02313	2.1923	3.14443				1.01056	0.713069	0.672709	0.683358				1.08351	0.882642	0.7909	0.410371
avg	1	0.776471	0.673853	0.558156			avg	1	0.835078	0.737847	0.817576			avg	1	0.897942	0.810609	0.725823		avg	1	1.06215	1.70862	2.85878			avg	1	0.738397	0.6847	0.724441			avg	1	0.798266	0.791201	0.564268
SD	0.0325979	0.0237915	0.0239158	0.0613744			SD	0.0642104	0.0439662	0.144772	0.00865422			SD	0.0346875	0.03345	0.0105553	0.0699116		SD	0.0478393	0.16471	0.344058	0.605419			SD	0.0219797	0.0316595	0.0351217	0.033987			SD	0.0590527	0.0814335	0.0437836	0.109899
T-test		0.00143433	0.000336768	0.000846875			T-test		0.0400567	0.0792974	0.0163761			T-test		0.0401328	0.00179056	0.00766075		T-test		0.635329	0.0447886	0.0123646			T-test		0.000658321	0.000422629	0.000650687			T-test		0.0470494	0.015907	0.00782112
	AMK							IPM							colistin						Tigecycline							LL37							Tannic Acid
	0	256	512	1024	μg/mL			0	4	8	16	μg/mL			0	0.125	0.25	0.5	μg/mL		0	0.25	0.5	1	μg/mL			0	2	4	8	μg/mL			0	50	100	200	μg/mL
OD595	0.6245	0.6375	0.6035	0.6185			OD595	0.8305	0.69272	0.794	0.3455			OD595	0.5395	0.752	0.5985	0.747		OD595	0.571	0.235	0.211	0.118			OD595	0.8305	0.668	0.8655	0.605			OD595	0.8305	0.645	0.631	0.641
	0.3895	0.657	0.311	0.652				0.762523	0.441	0.409	0.457				0.757	0.341	0.604	0.3455			0.559	0.222	0.236	0.101				0.559	0.378	0.337	0.332				0.7315	0.6635	0.6695	0.664
	0.3845	0.307	0.341	0.385				0.757	0.415	0.488	0.436				0.3895	0.352	0.362	0.777			0.536	0.229	0.132	0.099				0.7315	0.357	0.339	0.347				0.757	0.577	0.574	0.622
